# Supplementary material for: Carcinoembryonic antigen-expressing oncolytic measles virus derivative in recurrent glioblastoma: a phase 1 trial
Source: PubMed Central journal article supplement (PMC10786937; doi:10.1038/s41467-023-43076-7), 2024-01-12
Supplement: 41467_2023_43076_MOESM3_ESM.pdf [file 41467_2023_43076_MOESM3_ESM.pdf]

## **Description of Additional Supplementary Files**

**Supplementary Data 1.** Gene counts for ISG expression in Group B Patients.

**Supplementary Data 2.** Immune profiling panel employed for gene expression analysis (Nanostring Technologies).
